# Supplementary material for: Association Between Serum Ferritin Levels and Frailty Risk in Community-Dwelling Older Adults: A Nationwide Population-Based Study
Source: Research Square preprint supplement (doi:10.21203/rs.3.rs-7644766/v1), 2025-11-06
Supplement: Supplementary file 1 [file 14963355fd4f993ddee2a81c.docx]

**Supplementary Table 1.** Variables included in the frailty index

|  | Items |
| --- | --- |
| Comorbidities | 1. Arthritis 2. Asthma 3. Cancer 4. Cardiovascular disease (myocardial infarction, angina) 5. Diabetes 6. Dyslipidemia 7. Hypertension 8. Stroke |
| Functional abilities | 1. Activities of daily living limitation 2. Inactivity 3. Difficulty in exercise 4. Difficulty in self-care 5. Difficulty in social activity 6. Chewing difficulty |
| Signs and symptoms | 1. Anxiety 2. Depression 3. Dyspnea 4. Fatigue 5. Pain or discomfort 6. Stress 7. Suicidal ideation 8. Weight loss (weight loss of 3 kg or more in the prior year) |
| Laboratory values | 1. Systolic blood pressure (>160 mmHg or <90 mmHg) 2. Diastolic blood pressure (>90 mmHg or <50 mmHg) 3. Blood urea nitrogen (>20 mg/dL or <7 mg/dL) 4. Creatinine (>1.2 mg/dL or <0.6 mg/dL) 5. Fasting glucose (>250 mg/dL or <90 mg/dL) 6. Fasting cholesterol (total cholesterol > 270 mg/dL or < 135 mg/dL) 7. High-density lipoprotein cholesterol (<40 mg/dL) 8. Triglyceride (>200 mg/dL) 9. Vitamin D (>50 ng/ml or <12 ng/ml) 10. Proteinuria (urine dipstick test positive) 11. Heart rate irregularity 12. Pulmonary function test abnormality |
| Additional items | 1. Body mass index (<18.5 kg/m2 or >25 kg/m2) 2. Current smoking |
